# Supplementary material
Source: publisher site journal article supplement (https://www.spandidos-publications.com/4542/downloadSupplementary)
Supplement: Supplementary file 1 [file downloadSupplementary]

## Sheet: Sheet1
Table SI. Sequences of the GAPDH primers used in the present study.
Species and reference genome	Primers	Primer sequences
Homo sapiens, NC_000012.12	1	Forward	5’-CTTAAAAAGTGCAGGGTCTGGC-3’
		Reverse	5’-AAGACAGGACAAGTAACTGGTTGA-3’
	2	Forward	5’-CTGGCTCTTAAAAAGTGCAGGGT-3’
		Reverse	5’-GGTACATGACAAGGTGCGG-3’
	3	Forward	5’-AAAAAGGGCCCTGACAACTCTTT-3
		Reverse	5’-CTTCAAGGGGTCTACATGGCAA-3’
